# Supplementary material for: Vortex fluidics mediated non-covalent physical entanglement of tannic acid and gelatin for entrapment of nutrients
Source: Royal Society of Chemistry journal article supplement (doi:10.1039/d0fo02230f), 2020-11-26
Supplement: d0fo02230f1.pdf [file d0fo02230f1.pdf]

### Supplementary Information (SI):

#### Vortex fluidics mediated non-covalent crosslinking of tannic acid and gelatin for entrapment of nutrients

Xuejiao Cao<sup>1^A</sup>, Nikita Joseph<sup>2^A</sup>, Matt Jellicoe<sup>2</sup>, Ahmed Hussein Mohammed Al-Antaki<sup>2</sup>, Xuan Luo<sup>2</sup>, Dongxiao Su<sup>1^\*</sup>, Shan He<sup>1,2^\*</sup>, Colin Raston<sup>2^\*</sup>

<sup>1</sup> Department of Food Science, School of Chemistry and Chemical Engineering, Guangzhou University, Guangzhou, Guangdong, 510006, China.

<sup>2</sup> Flinders Institute for Nanoscale Science and Technology, College of Science and Engineering, Flinders University, Bedford Park, South Australia, 5042, Australia

#### Optimization of the rotational speed, flow-rate and tilt angle for preparing cross-linked gel

Gels were formulated using gelatin and tannic acid. At the optimized condition, gelatin and tannic acid were mixed with a pH of 6. Briefly, the mixed solution was introduced into the borosilicate glass tube (20 mm OD, 17 mm ID) in the VFD through a jet-feed, with the tube rotating at 7000 rpm, at a flow-rate of 0.3 mL/min, with the tilt angle of the tube at 45°, and the device operating at room temperature. The data for optimizing the rotating speed, flow-rate and tilt angle are shown below:

#### Speed optimization:

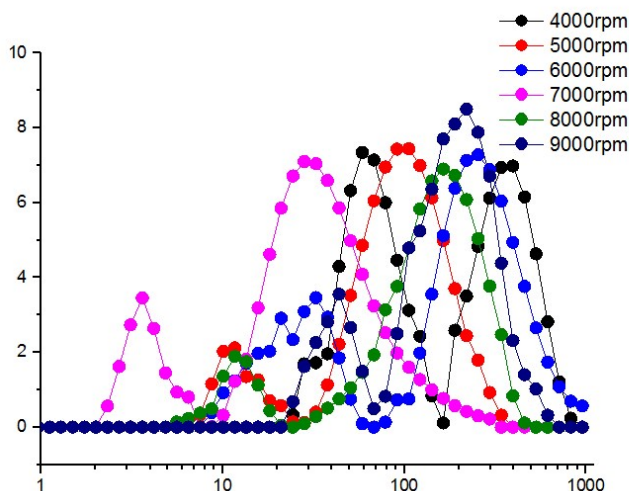

**Figure S1.** Dynamic light scattering (DLS) data for cross-linked gels prepared using a vortex fluidic device (VFD) operating at different rotating speeds, for a fixed tilt angle (45°) and flow rate (0.3 mL/min).

### Flow-rate optimization:

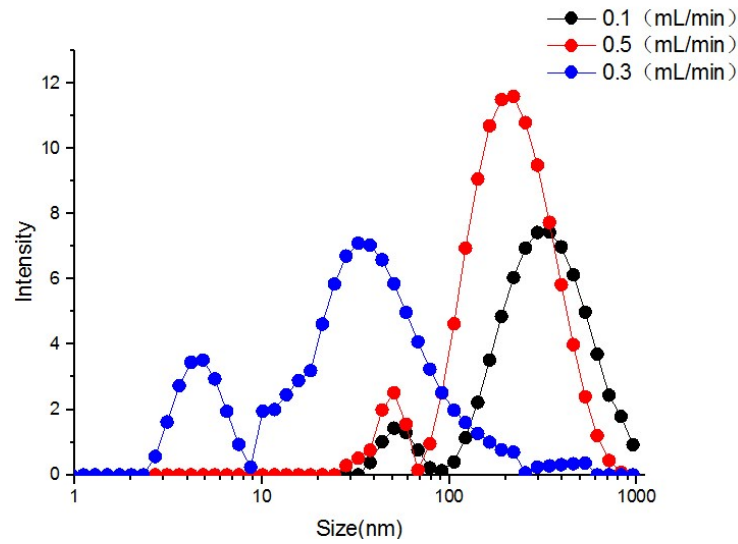

**Figure S2.** Dynamic light scattering (DLS) data for cross-linked gels prepared using a vortex fluidic device (VFD) operating at different flow rate, with a fixed rotational speed (7000 rpm) and tilt angle (45°).

**Angle optimization:**

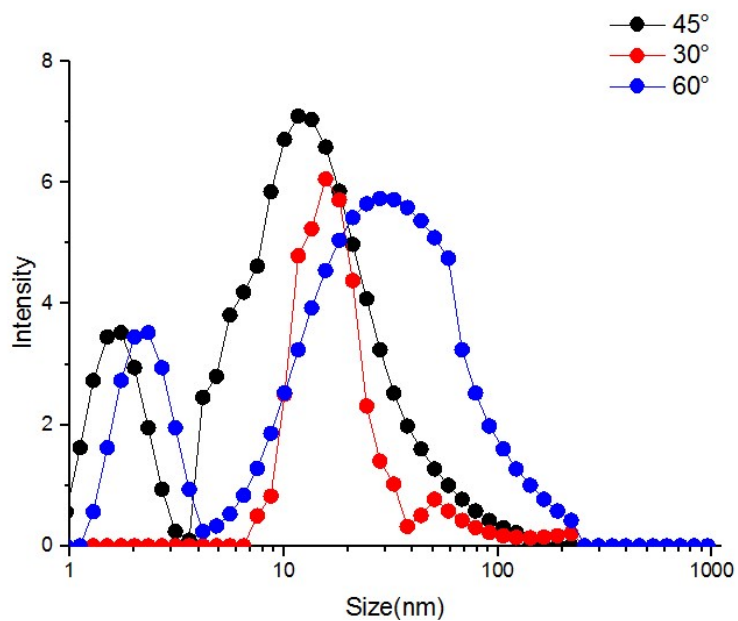

**Figure S3.** Dynamic light scattering (DLS) data for cross-linked gels using a vortex fluidic device (VFD) operating at different tilt angles, with a fixed rotational speed (7000 rpm) and fixed flow rates (0.3 mL/min).
